# Supplementary material for: Nanocomposites of SnO2@ordered mesoporous carbon (OMC) as anode materials for lithium-ion batteries with improved electrochemical performance
Source: Royal Society of Chemistry journal article supplement (doi:10.1039/c3ce41256c), 2013-01-01
Supplement: c3ce41256c.pdf [file c3ce41256c.pdf]

### *Supporting Information*

**Nanocomposites of SnO<sub>2</sub>@ordered mesoporous carbon (OMC) as anode materials for lithium-ion batteries with improved electrochemical performance\***

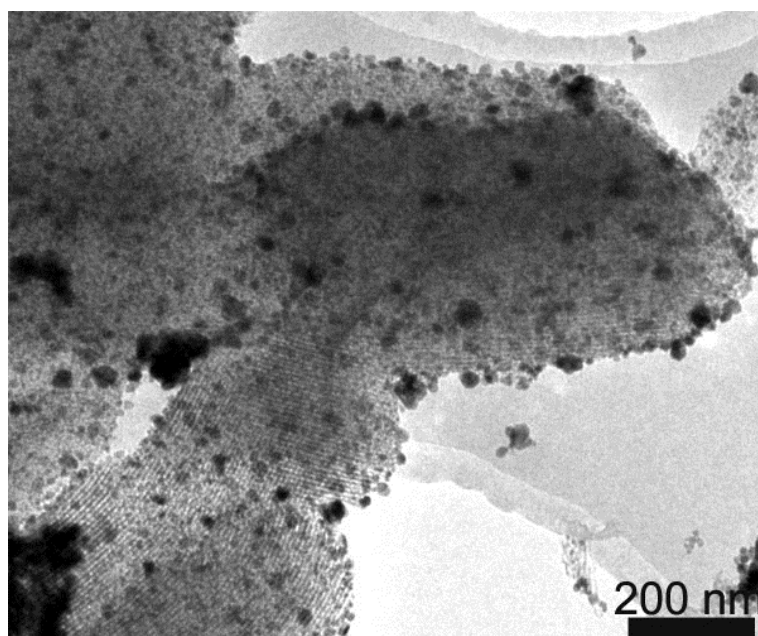

Fig. S1 Low magnification TEM image of the 20SnO<sub>2</sub>@OMC nanocomposite samples.

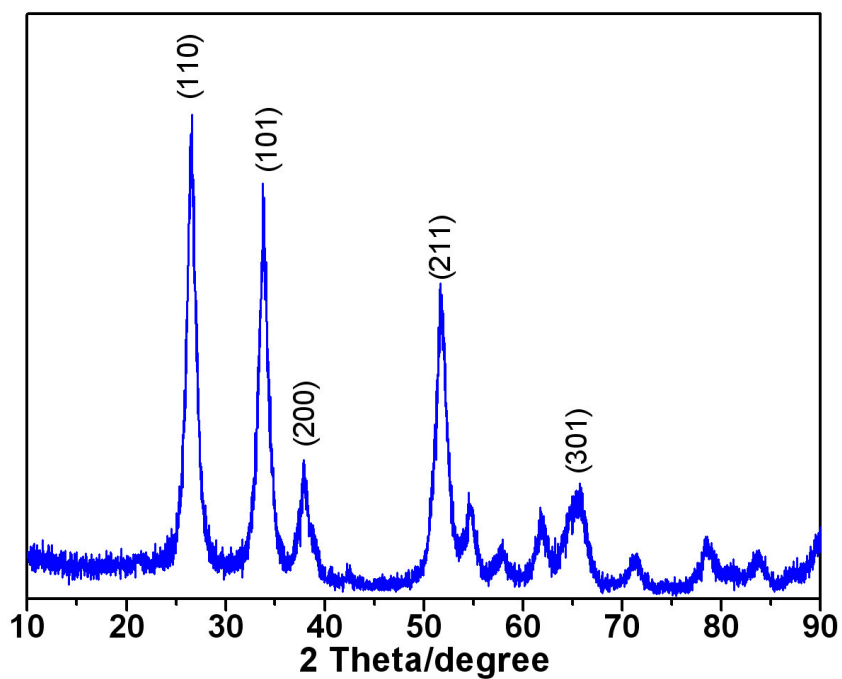

Fig. S2 Wide-angle XRD patterns of 25SnO<sub>2</sub>@OMC samples.

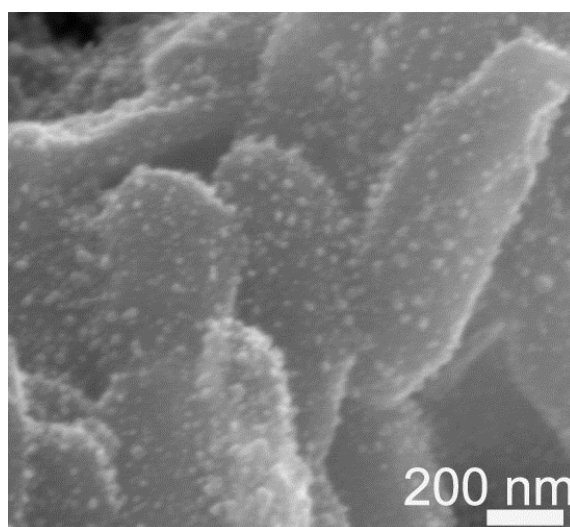

Fig. S3 SEM image of 25SnO<sub>2</sub>@OMC samples.

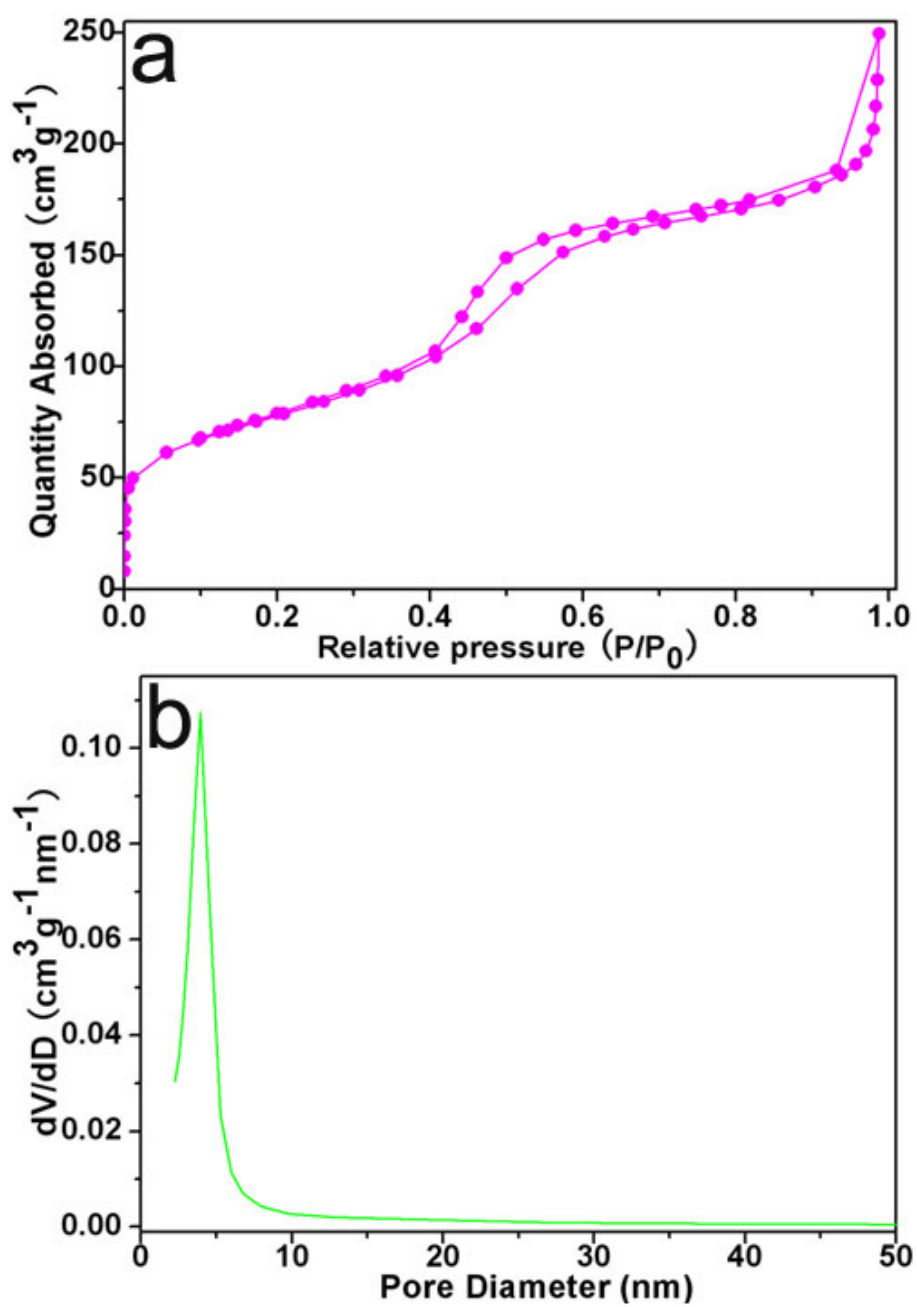

Fig. S4 (a)  $\text{N}_2$  adsorption-desorption isotherms of  $25\text{SnO}_2@OMC$  samples and (b) pore size distributions of  $25\text{SnO}_2@OMC$  samples.

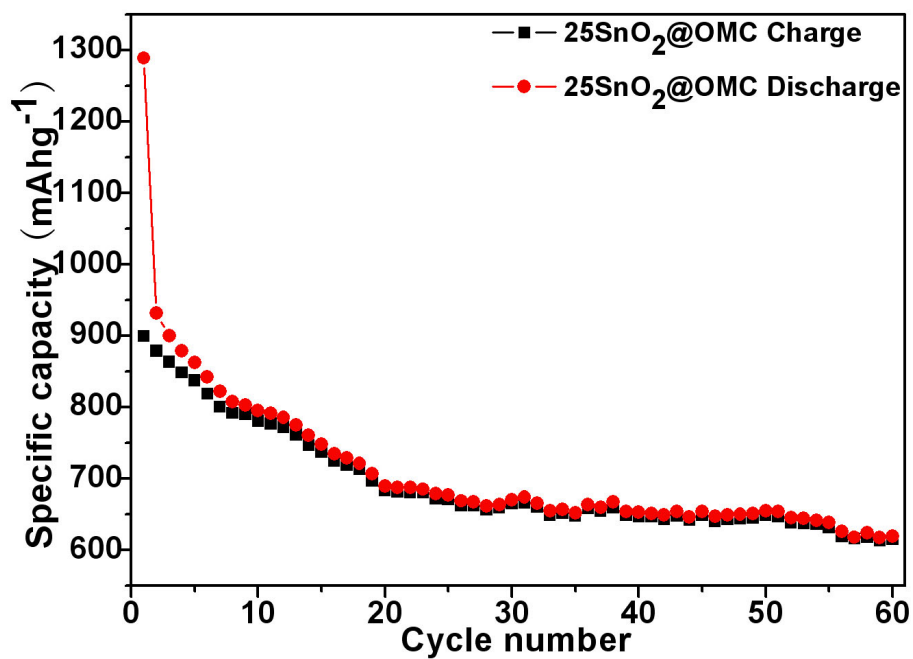

Fig. S5 Capacity vs. cycle number curves of the 25SnO<sub>2</sub>@OMC electrodes.

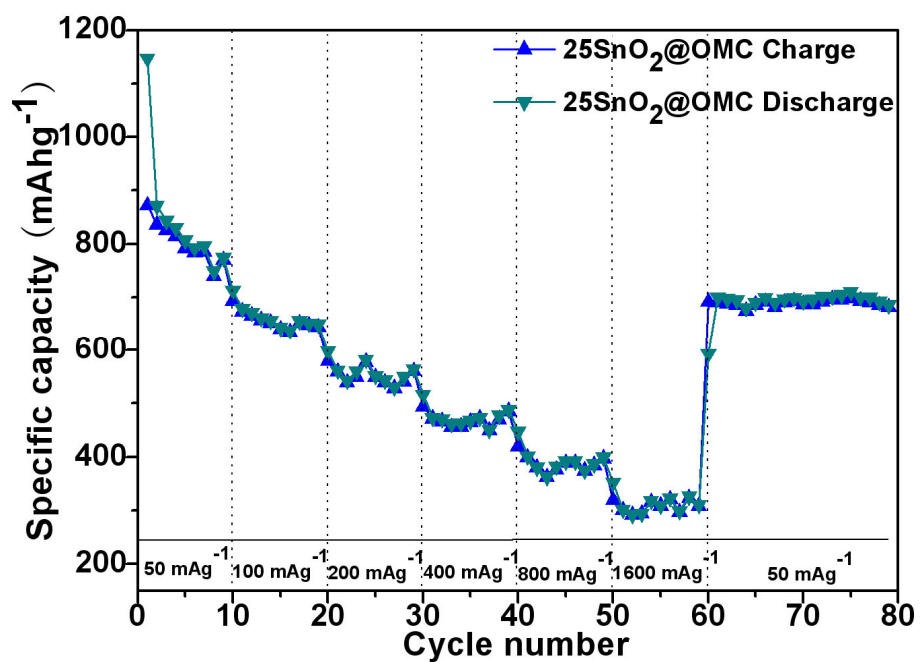

Fig. S6 Rate capacity for the 25SnO<sub>2</sub>@OMC.
